# Supplementary material for: A Pooled Analysis of Bone Marrow Micrometastasis in Breast Cancer
Source: Atypon-hosted journal article supplement (doi:10.1056/nejmoa050434), 2005-08-24
Supplement: 793sa1.pdf [file 793sa1.pdf]

## Supplementary Appendix

This appendix has been provided by the authors to give readers additional information about their work.

Supplement to: Braun S, Vogt FD, Naume B, et al. A pooled analysis of bone marrow micrometastasis in breast cancer. *N Engl J Med* 2005;353:793-802.

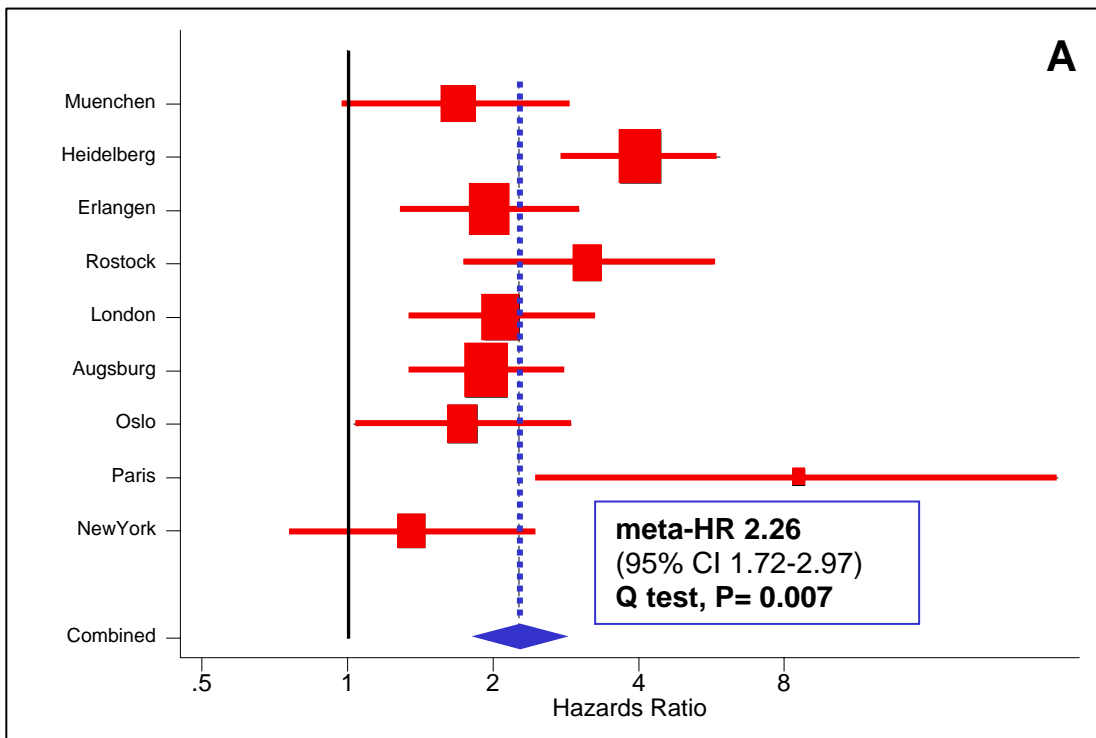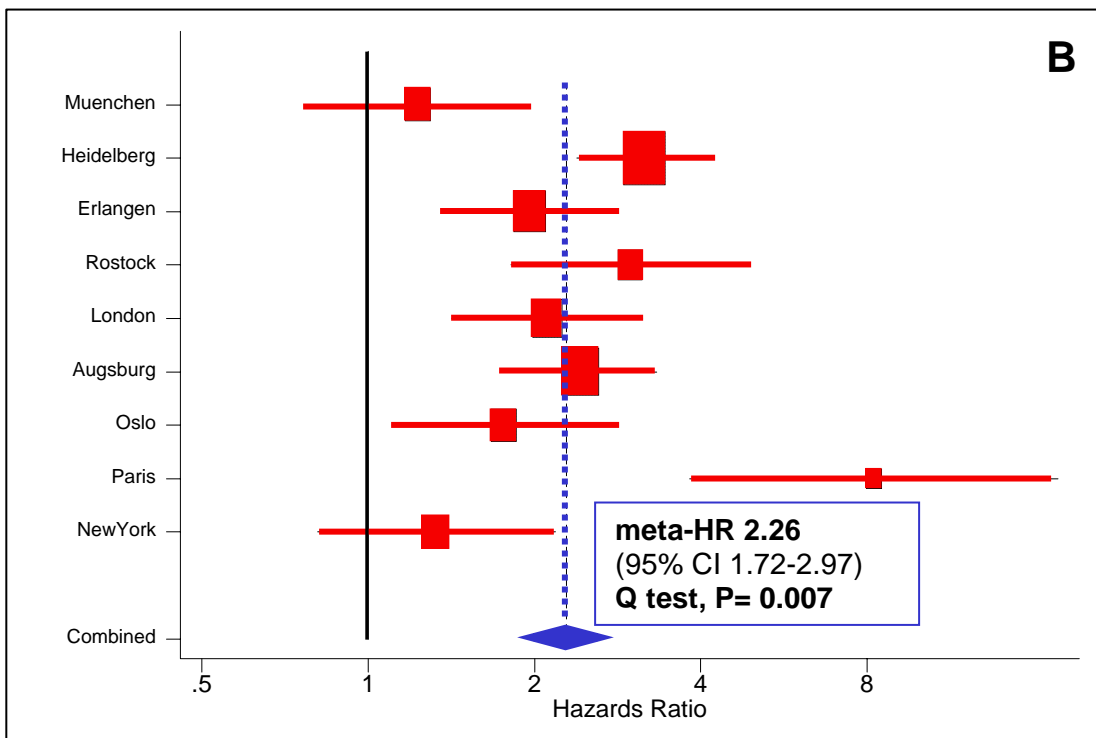

**Figure. Meta-analysis**

Random-effects meta-analysis of the effect of bone micrometastasis on overall survival (Panel A) and disease-free survival (Panel B). Data are presented as the hazards ratio for each study (boxes), 95% confidence intervals (horizontal lines) and summary hazards ratio with 95% confidence interval (diamond). The vertical black solid line indicates a hazards ratio of 1.0.

**Table. Sensitivity Analysis**

| Center                       | Meta-analytic Random Effects Model* |           |                     |
|------------------------------|-------------------------------------|-----------|---------------------|
|                              | HR                                  | 95% CI    | Q Test <sup>†</sup> |
| <b>Overall Survival</b>      |                                     |           |                     |
| <i>All centers included</i>  | 2.26                                | 1.72-2.97 | 0.007               |
| <i>Muenchen excluded</i>     | 2.15                                | 1.67-2.77 | 0.006               |
| <i>Heidelberg excluded</i>   | 2.02                                | 1.62-2.51 | 0.180               |
| <i>Erlangen excluded</i>     | 2.32                                | 1.70-3.17 | 0.004               |
| <i>Rostock excluded</i>      | 2.26                                | 1.72-2.97 | 0.007               |
| <i>London excluded</i>       | 2.30                                | 1.68-3.15 | 0.004               |
| <i>Augsburg excluded</i>     | 2.33                                | 1.70-3.20 | 0.005               |
| <i>Oslo excluded</i>         | 2.35                                | 1.74-3.47 | 0.006               |
| <i>Paris excluded</i>        | 2.25                                | 1.67-2.77 | 0.020               |
| <i>NewYork excluded</i>      | 2.40                                | 1.81-3.17 | 0.012               |
| <b>Disease-free Survival</b> |                                     |           |                     |
| <i>All centers included</i>  | 2.26                                | 1.72-2.97 | <0.001              |
| <i>Muenchen excluded</i>     | 2.42                                | 1.86-3.17 | 0.002               |
| <i>Heidelberg excluded</i>   | 2.14                                | 1.60-2.87 | 0.001               |
| <i>Erlangen excluded</i>     | 2.31                                | 1.69-3.16 | <0.001              |
| <i>Rostock excluded</i>      | 2.19                                | 1.63-2.95 | <0.001              |
| <i>London excluded</i>       | 2.30                                | 1.68-3.12 | <0.001              |
| <i>Augsburg excluded</i>     | 2.25                                | 1.63-3.10 | <0.001              |
| <i>Oslo excluded</i>         | 2.33                                | 1.73-3.15 | <0.001              |
| <i>Paris excluded</i>        | 2.07                                | 1.64-2.61 | 0.007               |
| <i>NewYork excluded</i>      | 2.40                                | 1.82-3.17 | 0.001               |

HR denotes for hazards ratio, CI for confidence interval.

\*For sensitivity (influential) analysis, meta-analytic hazards ratios and confidence intervals were computed omitting one study at a time. Each line indicates meta-analytic hazards ratio and 95% confidence interval excluding the center identified in the first column.

<sup>†</sup>A significant P value (Q test) indicates significant inter-study variation of reported hazards ratios. Similar magnitude of hazards ratio estimates and confidence intervals, however, indicate overall statistical robustness of the meta-analysis.
